# Supplementary material for: Can the EVIDEM Framework Tackle Issues Raised by Evaluating Treatments for Rare Diseases: Analysis of Issues and Policies, and Context-Specific Adaptation
Source: PubMed Central journal article supplement — Pharmacoeconomics. 2015 Nov 7;34:285–301. doi: 10.1007/s40273-015-0340-5 (PMC4766242; doi:10.1007/s40273-015-0340-5), 2015-11-07
Supplement: 40273_2015_340_MOESM1_ESM.pdf [file 40273_2015_340_MOESM1_ESM.pdf]

Evidence and scoring matrix for the adapted MCDA framework

| <b>OBJECTIVES</b><br><b>CRITERIA</b><br><i>Sub-criteria</i>              | Synthesis of available evidence / Questions to consider | Score (quantitative)                                                                                                                                                                                                                                                                                                             | Comments |
|--------------------------------------------------------------------------|---------------------------------------------------------|----------------------------------------------------------------------------------------------------------------------------------------------------------------------------------------------------------------------------------------------------------------------------------------------------------------------------------|----------|
| <b>NORMATIVE UNIVERSAL OBJECTIVES – QUANTITATIVE APPRAISAL</b>           |                                                         |                                                                                                                                                                                                                                                                                                                                  |          |
| <b>OBJECTIVE: ADDRESSING AREAS OF HIGH THERAPEUTIC NEED</b>              |                                                         |                                                                                                                                                                                                                                                                                                                                  |          |
| <b>DISEASE SEVERITY</b>                                                  |                                                         |                                                                                                                                                                                                                                                                                                                                  |          |
| <i>Effect of disease on life-expectancy</i>                              |                                                         | <input type="checkbox"/> 5 Very severe<br><input type="checkbox"/> 4<br><input type="checkbox"/> 3<br><input type="checkbox"/> 2<br><input type="checkbox"/> 1<br><input type="checkbox"/> 0 No effect                                                                                                                           |          |
| <i>Effect of disease on morbidity (includes disability and function)</i> |                                                         | <input type="checkbox"/> 5 Very severe<br><input type="checkbox"/> 4<br><input type="checkbox"/> 3<br><input type="checkbox"/> 2<br><input type="checkbox"/> 1<br><input type="checkbox"/> 0 No effect                                                                                                                           |          |
| <i>Effect of disease on patients' quality of life</i>                    |                                                         | <input type="checkbox"/> 5 Very severe<br><input type="checkbox"/> 4<br><input type="checkbox"/> 3<br><input type="checkbox"/> 2<br><input type="checkbox"/> 1<br><input type="checkbox"/> 0 No effect                                                                                                                           |          |
| <i>Effect of disease on caregivers' quality of life</i>                  |                                                         | <input type="checkbox"/> 5 Very severe<br><input type="checkbox"/> 4<br><input type="checkbox"/> 3<br><input type="checkbox"/> 2<br><input type="checkbox"/> 1<br><input type="checkbox"/> 0 No effect                                                                                                                           |          |
| <b>SIZE OF POPULATION AFFECTED</b>                                       |                                                         | X=Prevalence or incidence<br><input type="checkbox"/> 5: X > 500/10,000<br><input type="checkbox"/> 4: X < 500/10,000<br><input type="checkbox"/> 3: X < 100/10,000<br><input type="checkbox"/> 2: X < 10/10,000<br><input type="checkbox"/> 1: X < 5/10,000 (rare)<br><input type="checkbox"/> 0: X < 2 in 100,000 (ultra rare) |          |

| <b>OBJECTIVES</b><br><b>CRITERIA</b><br><i>Sub-criteria</i>                                                                                                                                                                                          | <b>Synthesis of available evidence / Questions to consider</b> | <b>Score (quantitative)</b>                                                                                                                                                                                                                                                                                                                                                                                      | <b>Comments</b> |
|------------------------------------------------------------------------------------------------------------------------------------------------------------------------------------------------------------------------------------------------------|----------------------------------------------------------------|------------------------------------------------------------------------------------------------------------------------------------------------------------------------------------------------------------------------------------------------------------------------------------------------------------------------------------------------------------------------------------------------------------------|-----------------|
| UNMET NEEDS                                                                                                                                                                                                                                          |                                                                | <input type="checkbox"/> 5 Many & serious<br><input type="checkbox"/> 4<br><input type="checkbox"/> 3<br><input type="checkbox"/> 2<br><input type="checkbox"/> 1<br><input type="checkbox"/> 0 No limitations                                                                                                                                                                                                   |                 |
| <b>OBJECTIVE 2: PROVIDING LARGE IMPROVEMENTS IN HEALTH OUTCOMES</b>                                                                                                                                                                                  |                                                                |                                                                                                                                                                                                                                                                                                                                                                                                                  |                 |
| <b>COMPARATIVE EFFECTIVENESS</b>                                                                                                                                                                                                                     |                                                                |                                                                                                                                                                                                                                                                                                                                                                                                                  |                 |
| <i>Improvement of efficacy outcome 1:</i>                                                                                                                                                                                                            |                                                                | <input type="checkbox"/> 5 Much better than comparator<br><input type="checkbox"/> 4<br><input type="checkbox"/> 3<br><input type="checkbox"/> 2<br><input type="checkbox"/> 1<br><input type="checkbox"/> 0 No difference<br><input type="checkbox"/> -1<br><input type="checkbox"/> -2<br><input type="checkbox"/> -3<br><input type="checkbox"/> -4<br><input type="checkbox"/> -5 Much worse than comparator |                 |
| <i>Etc.</i>                                                                                                                                                                                                                                          |                                                                |                                                                                                                                                                                                                                                                                                                                                                                                                  |                 |
| <b>COMPARATIVE SAFETY / TOLERABILITY</b><br><i>includes</i> <ul style="list-style-type: none"> <li>• Adverse events</li> <li>• Serious adverse events</li> <li>• Fatal adverse events</li> <li>• Long-term safety</li> <li>• Tolerability</li> </ul> |                                                                | <input type="checkbox"/> 5 Much better than comparator<br><input type="checkbox"/> 4<br><input type="checkbox"/> 3<br><input type="checkbox"/> 2<br><input type="checkbox"/> 1<br><input type="checkbox"/> 0 No difference<br><input type="checkbox"/> -1<br><input type="checkbox"/> -2<br><input type="checkbox"/> -3<br><input type="checkbox"/> -4<br><input type="checkbox"/> -5 Much worse than comparator |                 |

| <b>OBJECTIVES</b>                                                                                                                                                                                                                                                                                                                          |                                                                |                                                                                                                                                                                                                                                                                                                                                                                                                   |                 |
|--------------------------------------------------------------------------------------------------------------------------------------------------------------------------------------------------------------------------------------------------------------------------------------------------------------------------------------------|----------------------------------------------------------------|-------------------------------------------------------------------------------------------------------------------------------------------------------------------------------------------------------------------------------------------------------------------------------------------------------------------------------------------------------------------------------------------------------------------|-----------------|
| <b>CRITERIA</b><br><i>Sub-criteria</i>                                                                                                                                                                                                                                                                                                     | <b>Synthesis of available evidence / Questions to consider</b> | <b>Score (quantitative)</b>                                                                                                                                                                                                                                                                                                                                                                                       | <b>Comments</b> |
| <b>COMPARATIVE PATIENT PERCEIVED HEALTH/PATIENT- REPORTED OUTCOMES (PRO) includes</b> <ul style="list-style-type: none"> <li>• <i>Improvement in health-related quality of life</i></li> <li>• <i>Impact on autonomy</i></li> <li>• <i>Impact on dignity</i></li> <li>• <i>Convenience/ ease of use/ mode of administration</i></li> </ul> |                                                                | <input type="checkbox"/> 5 Much better than comparator<br><input type="checkbox"/> 4<br><input type="checkbox"/> 3<br><input type="checkbox"/> 2<br><input type="checkbox"/> 1<br><input type="checkbox"/> 0 No difference<br><input type="checkbox"/> -1<br><input type="checkbox"/> -2<br><input type="checkbox"/> -3<br><input type="checkbox"/> -4<br><input type="checkbox"/> -5 Much worse than comparator  |                 |
| <b>OBJECTIVE: DELIVERING IMPORTANT TYPES OF HEALTH BENEFIT</b>                                                                                                                                                                                                                                                                             |                                                                |                                                                                                                                                                                                                                                                                                                                                                                                                   |                 |
| <b>TYPE OF PREVENTIVE BENEFIT</b>                                                                                                                                                                                                                                                                                                          |                                                                | <input type="checkbox"/> 5 Elimination of disease<br><input type="checkbox"/> 4<br><input type="checkbox"/> 3<br><input type="checkbox"/> 2<br><input type="checkbox"/> 1<br><input type="checkbox"/> 0 No reduction in risk of disease                                                                                                                                                                           |                 |
| <b>TYPE OF THERAPEUTIC BENEFIT</b>                                                                                                                                                                                                                                                                                                         |                                                                | <input type="checkbox"/> 5 Cure / life saving<br><input type="checkbox"/> 4<br><input type="checkbox"/> 3<br><input type="checkbox"/> 2<br><input type="checkbox"/> 1<br><input type="checkbox"/> 0 No impact on existing condition                                                                                                                                                                               |                 |
| <b>OBJECTIVE: PRODUCING FAVORABLE ECONOMIC CONSEQUENCES</b>                                                                                                                                                                                                                                                                                |                                                                |                                                                                                                                                                                                                                                                                                                                                                                                                   |                 |
| <b>COMPARATIVE COST CONSEQUENCES – COST OF INTERVENTION</b> <i>Including acquisition, implementation, maintenance costs and replacement of existing treatment</i>                                                                                                                                                                          |                                                                | <input type="checkbox"/> 5 Substantial savings<br><input type="checkbox"/> 4<br><input type="checkbox"/> 3<br><input type="checkbox"/> 2<br><input type="checkbox"/> 1<br><input type="checkbox"/> 0 No difference<br><input type="checkbox"/> -1<br><input type="checkbox"/> -2<br><input type="checkbox"/> -3<br><input type="checkbox"/> -4<br><input type="checkbox"/> -5 Substantial additional expenditures |                 |

| OBJECTIVES                                              |                                                         |                                                                                                                                                                                                                                                                                                                                                                                                                   |          |
|---------------------------------------------------------|---------------------------------------------------------|-------------------------------------------------------------------------------------------------------------------------------------------------------------------------------------------------------------------------------------------------------------------------------------------------------------------------------------------------------------------------------------------------------------------|----------|
| CRITERIA                                                | Synthesis of available evidence / Questions to consider | Score (quantitative)                                                                                                                                                                                                                                                                                                                                                                                              | Comments |
| <i>Sub-criteria</i>                                     |                                                         |                                                                                                                                                                                                                                                                                                                                                                                                                   |          |
| COMPARATIVE COST CONSEQUENCES—<br>OTHER MEDICAL COSTS   |                                                         |                                                                                                                                                                                                                                                                                                                                                                                                                   |          |
| <i>Other medical costs to the<br/>healthcare system</i> |                                                         | <input type="checkbox"/> 5 Substantial savings<br><input type="checkbox"/> 4<br><input type="checkbox"/> 3<br><input type="checkbox"/> 2<br><input type="checkbox"/> 1<br><input type="checkbox"/> 0 No difference<br><input type="checkbox"/> -1<br><input type="checkbox"/> -2<br><input type="checkbox"/> -3<br><input type="checkbox"/> -4<br><input type="checkbox"/> -5 Substantial additional expenditures |          |
| <i>Medical costs to patients</i>                        |                                                         | <input type="checkbox"/> 5 Substantial savings<br><input type="checkbox"/> 4<br><input type="checkbox"/> 3<br><input type="checkbox"/> 2<br><input type="checkbox"/> 1<br><input type="checkbox"/> 0 No difference<br><input type="checkbox"/> -1<br><input type="checkbox"/> -2<br><input type="checkbox"/> -3<br><input type="checkbox"/> -4<br><input type="checkbox"/> -5 Substantial additional expenditures |          |
| COMPARATIVE COST CONSEQUENCES— NON-<br>MEDICAL COSTS    |                                                         |                                                                                                                                                                                                                                                                                                                                                                                                                   |          |
| <i>Patients' and caregivers' productivity<br/>costs</i> |                                                         | <input type="checkbox"/> 5 Substantial savings<br><input type="checkbox"/> 4<br><input type="checkbox"/> 3<br><input type="checkbox"/> 2<br><input type="checkbox"/> 1<br><input type="checkbox"/> 0 No difference<br><input type="checkbox"/> -1<br><input type="checkbox"/> -2<br><input type="checkbox"/> -3<br><input type="checkbox"/> -4<br><input type="checkbox"/> -5 Substantial additional expenditures |          |

| <b>OBJECTIVES</b>                                                                     |                                                                |                                                                                                                                                                                                                                                                                                                                                                                                                   |                 |
|---------------------------------------------------------------------------------------|----------------------------------------------------------------|-------------------------------------------------------------------------------------------------------------------------------------------------------------------------------------------------------------------------------------------------------------------------------------------------------------------------------------------------------------------------------------------------------------------|-----------------|
| <b>CRITERIA</b>                                                                       | <b>Synthesis of available evidence / Questions to consider</b> | <b>Score (quantitative)</b>                                                                                                                                                                                                                                                                                                                                                                                       | <b>Comments</b> |
| <i>Sub-criteria</i>                                                                   |                                                                |                                                                                                                                                                                                                                                                                                                                                                                                                   |                 |
| <i>Costs to the wider social care system</i>                                          |                                                                | <input type="checkbox"/> 5 Substantial savings<br><input type="checkbox"/> 4<br><input type="checkbox"/> 3<br><input type="checkbox"/> 2<br><input type="checkbox"/> 1<br><input type="checkbox"/> 0 No difference<br><input type="checkbox"/> -1<br><input type="checkbox"/> -2<br><input type="checkbox"/> -3<br><input type="checkbox"/> -4<br><input type="checkbox"/> -5 Substantial additional expenditures |                 |
| <i>Non-medical costs to patients (e.g., transportation expenses, paid caregivers)</i> |                                                                | <input type="checkbox"/> 5 Substantial savings<br><input type="checkbox"/> 4<br><input type="checkbox"/> 3<br><input type="checkbox"/> 2<br><input type="checkbox"/> 1<br><input type="checkbox"/> 0 No difference<br><input type="checkbox"/> -1<br><input type="checkbox"/> -2<br><input type="checkbox"/> -3<br><input type="checkbox"/> -4<br><input type="checkbox"/> -5 Substantial additional expenditures |                 |
| <b>OBJECTIVE: REDUCING UNCERTAINTY THROUGH SOLID KNOWLEDGE</b>                        |                                                                |                                                                                                                                                                                                                                                                                                                                                                                                                   |                 |
| <b>QUALITY OF EVIDENCE</b>                                                            |                                                                |                                                                                                                                                                                                                                                                                                                                                                                                                   |                 |
| <i>Clinical evidence</i>                                                              |                                                                | <input type="checkbox"/> 5 Well reported, highly relevant and valid<br><input type="checkbox"/> 4<br><input type="checkbox"/> 3<br><input type="checkbox"/> 2<br><input type="checkbox"/> 1<br><input type="checkbox"/> 0 Not relevant and/or invalid                                                                                                                                                             |                 |
| <i>Epidemiology evidence</i>                                                          |                                                                | <input type="checkbox"/> 5 Well reported, highly relevant and valid<br><input type="checkbox"/> 4<br><input type="checkbox"/> 3<br><input type="checkbox"/> 2<br><input type="checkbox"/> 1<br><input type="checkbox"/> 0 Not relevant and/or invalid                                                                                                                                                             |                 |

| <b>OBJECTIVES</b>                                                                                                                                                                                                                                        |                                                                |                                                                                                                                                                                                                                                                                              |                 |
|----------------------------------------------------------------------------------------------------------------------------------------------------------------------------------------------------------------------------------------------------------|----------------------------------------------------------------|----------------------------------------------------------------------------------------------------------------------------------------------------------------------------------------------------------------------------------------------------------------------------------------------|-----------------|
| <b>CRITERIA</b><br><i>Sub-criteria</i>                                                                                                                                                                                                                   | <b>Synthesis of available evidence / Questions to consider</b> | <b>Score (quantitative)</b>                                                                                                                                                                                                                                                                  | <b>Comments</b> |
| <i>Economic evidence</i>                                                                                                                                                                                                                                 |                                                                | <input type="checkbox"/> 5 Well reported, highly relevant and valid<br><input type="checkbox"/> 4<br><input type="checkbox"/> 3<br><input type="checkbox"/> 2<br><input type="checkbox"/> 1<br><input type="checkbox"/> 0 Not relevant and/or invalid                                        |                 |
| <b>EXPERT CONSENSUS / CLINICAL PRACTICE GUIDELINES</b>                                                                                                                                                                                                   |                                                                | <input type="checkbox"/> 5 Strong first-line recommendation for drug above all other alternatives<br><input type="checkbox"/> 4<br><input type="checkbox"/> 3<br><input type="checkbox"/> 2<br><input type="checkbox"/> 1<br><input type="checkbox"/> 0 No recommendation or not recommended |                 |
| <b>OBJECTIVE: ADDRESSING PRIORITIES TO INCREASE FAIRNESS / JUSTICE</b> include in quantitative model if applicable to society / healthcare system / health plan)<br><i>Is there any value to be derived from priorities and fairness considerations?</i> |                                                                |                                                                                                                                                                                                                                                                                              |                 |
| <b>RARE DISEASES</b>                                                                                                                                                                                                                                     |                                                                | <input type="checkbox"/> 5 Strong alignment with rare disease priority<br><input type="checkbox"/> 4<br><input type="checkbox"/> 3<br><input type="checkbox"/> 2<br><input type="checkbox"/> 1<br><input type="checkbox"/> 0 No alignment with rare disease priority                         |                 |
| <b>OTHER PRIORITIES</b><br><i>(e.g., cancer, diabetes, remote population)</i>                                                                                                                                                                            |                                                                | <input type="checkbox"/> 5 Strong alignment with other established priorities<br><input type="checkbox"/> 4<br><input type="checkbox"/> 3<br><input type="checkbox"/> 2<br><input type="checkbox"/> 1<br><input type="checkbox"/> 0 No alignment with other established priorities           |                 |

| OBJECTIVES<br>CRITERIA<br>Sub-criteria                                                                                                                                                                                       | Synthesis of available evidence / Questions to consider                                                                                                                                                                                                                                                                                                                          | Impact on value (qualitative)                                                                                              | Comments |
|------------------------------------------------------------------------------------------------------------------------------------------------------------------------------------------------------------------------------|----------------------------------------------------------------------------------------------------------------------------------------------------------------------------------------------------------------------------------------------------------------------------------------------------------------------------------------------------------------------------------|----------------------------------------------------------------------------------------------------------------------------|----------|
| <b>NORMATIVE CONTEXTUAL OBJECTIVES – QUALITATIVE APPRAISAL</b>                                                                                                                                                               |                                                                                                                                                                                                                                                                                                                                                                                  |                                                                                                                            |          |
| <b>OBJECTIVE: ALIGNING WITH THE MANDATE AND SCOPE OF HEALTHCARE SYSTEM</b>                                                                                                                                                   |                                                                                                                                                                                                                                                                                                                                                                                  |                                                                                                                            |          |
| <b>MANDATE AND SCOPE OF HEALTHCARE</b>                                                                                                                                                                                       | <i>Is the intervention aligned with the mandate/scope of healthcare in your country/region?<br/>Does the consideration of this criterion have an impact on the value of the intervention?</i> <ul style="list-style-type: none"> <li>for example, lifestyle treatments may not fall under the scope of healthcare</li> </ul> <b>Evidence:</b><br><b>Insights from appraiser:</b> | <input type="checkbox"/> Positive impact<br><input type="checkbox"/> No impact<br><input type="checkbox"/> Negative impact |          |
| <b>OBJECTIVE: ALIGNING WITH THE COMMON GOAL</b>                                                                                                                                                                              |                                                                                                                                                                                                                                                                                                                                                                                  |                                                                                                                            |          |
| <b>COMMON GOAL AND SPECIFIC INTERESTS</b><br><i>To consider:</i> <ul style="list-style-type: none"> <li>Stakeholder pressures</li> <li>Stakeholder barriers</li> <li>Conflict of interest</li> </ul>                         | <i>Are you aware of pressures/barriers from stakeholders regarding this intervention?<br/>Does the consideration of this criterion have an impact on the value of the intervention?</i> <b>Evidence:</b><br><b>Insights from appraiser:</b>                                                                                                                                      | <input type="checkbox"/> Positive impact<br><input type="checkbox"/> No impact<br><input type="checkbox"/> Negative impact |          |
| <b>OBJECTIVE: ENSURING ENVIRONMENTAL SUSTAINABILITY</b>                                                                                                                                                                      |                                                                                                                                                                                                                                                                                                                                                                                  |                                                                                                                            |          |
| <b>ENVIRONMENTAL IMPACT</b><br><i>To consider:</i> <ul style="list-style-type: none"> <li>Environmental impact of production</li> <li>Environmental impact of use</li> <li>Environmental impact of implementation</li> </ul> | <i>Does the intervention have a potential environmental impact?<br/>Does the consideration of this criterion have an impact on the value of the intervention?</i> <b>Evidence:</b><br><b>Insights from appraiser:</b>                                                                                                                                                            | <input type="checkbox"/> Positive impact<br><input type="checkbox"/> No impact<br><input type="checkbox"/> Negative impact |          |
| <b>FEASIBILITY CONTEXTUAL OBJECTIVES – QUALITATIVE APPRAISAL</b>                                                                                                                                                             |                                                                                                                                                                                                                                                                                                                                                                                  |                                                                                                                            |          |
| <b>OBJECTIVE: BEING AFFORDABLE WITH LOW OPPORTUNITY COSTS</b>                                                                                                                                                                |                                                                                                                                                                                                                                                                                                                                                                                  |                                                                                                                            |          |
| <b>OPPORTUNITY COSTS &amp; AFFORDABILITY</b><br><i>To consider:</i> <ul style="list-style-type: none"> <li>Opportunity costs for patient (forgone resources)</li> <li>Opportunity costs for population</li> </ul>            | <i>Does the intervention result in significant displacement of resources of the healthcare system in your country/region?<br/>Does the consideration of this criterion have an impact on the value of the intervention?</i> <b>Evidence:</b>                                                                                                                                     | <input type="checkbox"/> Positive impact<br><input type="checkbox"/> No impact<br><input type="checkbox"/> Negative impact |          |

| <b>OBJECTIVES</b><br><b>CRITERIA</b><br><i>Sub-criteria</i>                                                                                                                                                                                                                                                                                                                                                                                                | <b>Synthesis of available evidence / Questions to consider</b>                                                                                                                                                                                                                                                                                                 | <b>Impact on value (qualitative)</b>                                                                                       | <b>Comments</b> |
|------------------------------------------------------------------------------------------------------------------------------------------------------------------------------------------------------------------------------------------------------------------------------------------------------------------------------------------------------------------------------------------------------------------------------------------------------------|----------------------------------------------------------------------------------------------------------------------------------------------------------------------------------------------------------------------------------------------------------------------------------------------------------------------------------------------------------------|----------------------------------------------------------------------------------------------------------------------------|-----------------|
| <b>NORMATIVE CONTEXTUAL OBJECTIVES – QUALITATIVE APPRAISAL</b>                                                                                                                                                                                                                                                                                                                                                                                             |                                                                                                                                                                                                                                                                                                                                                                |                                                                                                                            |                 |
| <i>(forgone resources)</i><br><ul style="list-style-type: none"> <li>Affordability</li> </ul>                                                                                                                                                                                                                                                                                                                                                              | <b>Insights from appraiser:</b>                                                                                                                                                                                                                                                                                                                                |                                                                                                                            |                 |
| <b>OBJECTIVE: ENSURING AND PRESERVING SYSTEM CAPACITY AND APPROPRIATE USE</b>                                                                                                                                                                                                                                                                                                                                                                              |                                                                                                                                                                                                                                                                                                                                                                |                                                                                                                            |                 |
| <b>SYSTEM CAPACITY &amp; APPROPRIATE USE OF INTERVENTION</b><br><i>To consider:</i> <ul style="list-style-type: none"> <li>Organizational requirements (e.g., process, premises, equipment)</li> <li>Skill requirements</li> <li>Legislative requirements</li> <li>Surveillance requirements</li> <li>Risk of inappropriate use</li> <li>Institutional/personal barriers to uptake</li> <li>Ability to reach the whole target region/population</li> </ul> | <i>Does the healthcare system in your country/region have sufficient capacity (e.g., skills, knowledge of intervention, surveillance system) to ensure appropriate use of the intervention?</i><br><i>Does the consideration of this criterion have an impact on the value of the intervention?</i><br><br><b>Evidence:</b><br><b>Insights from appraiser:</b> | <input type="checkbox"/> Positive impact<br><input type="checkbox"/> No impact<br><input type="checkbox"/> Negative impact |                 |
| <b>OBJECTIVE: HAVING FAVORABLE POLITICAL , HISTORICAL AND CULTURAL CONTEXT</b>                                                                                                                                                                                                                                                                                                                                                                             |                                                                                                                                                                                                                                                                                                                                                                |                                                                                                                            |                 |
| <b>POLITICAL/ HISTORICAL CONTEXT</b><br><i>To consider:</i> <ul style="list-style-type: none"> <li>Political priorities and context</li> <li>Cultural acceptability</li> <li>Precedence (congruence with previous and future decisions)</li> <li>Impact on innovation &amp; research</li> <li>Impact on partnership &amp; collaboration among healthcare stakeholders</li> </ul>                                                                           | <i>Are you aware of any political/historical aspect regarding this intervention (such as precedence, impact on innovation, impact on collaboration within the healthcare system)?</i><br><i>Does the consideration of this criterion have an impact on the value of the intervention?</i><br><br><b>Evidence:</b><br><b>Insights from appraiser:</b>           | <input type="checkbox"/> Positive impact<br><input type="checkbox"/> No impact<br><input type="checkbox"/> Negative impact |                 |
